# Supplementary material for: A First Draft of the Core Fungal Microbiome of Schedonorus arundinaceus with and without Its Fungal Mutualist Epichloë coenophiala
Source: MDPI journal article supplement (doi:10.3390/jof8101026), 2022-09-28

**Figure S1:** Climate data. Shown are the data from an Environment and Climate Change Canada weather station located 18.5 km from our field site, at 43° 32" N, 80° 42" W. We sampled on 5 July 2017 and 6 July 2018, shown in C.

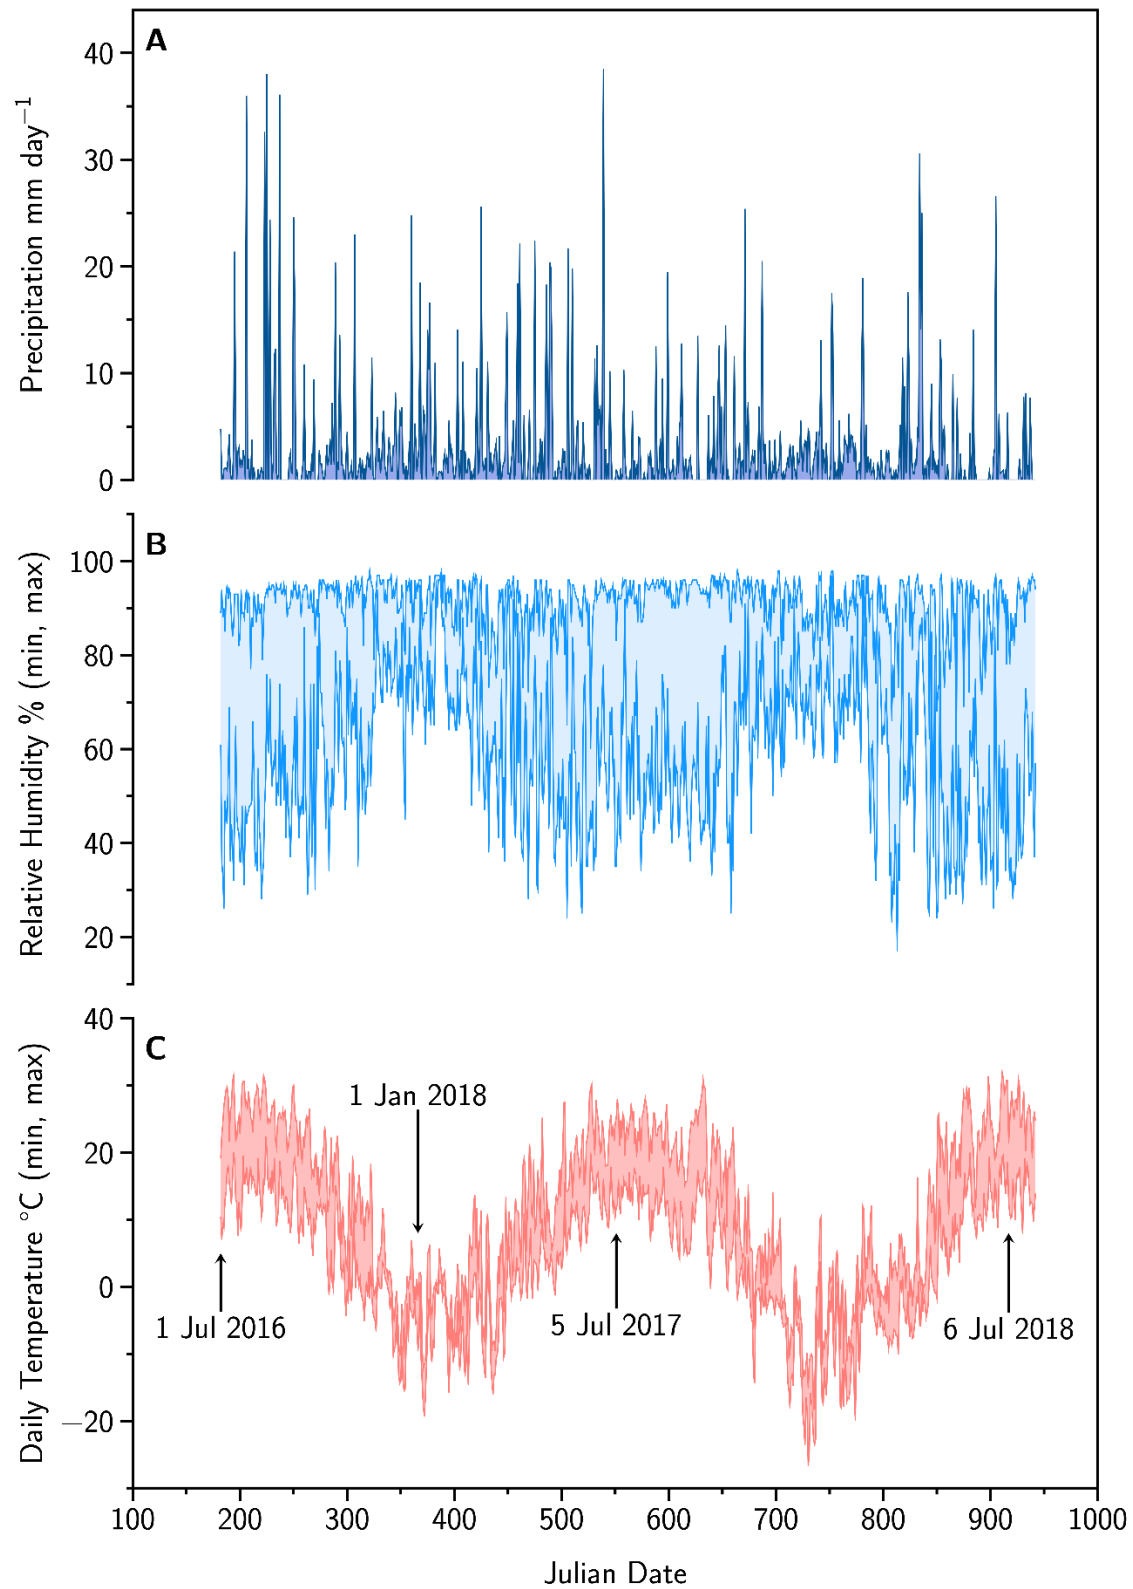

**Figure S2.** Rarefaction curves of ASVs and number of reads for all samples, separated by *Epichloë coenophiala* treatment and year. E+: common toxic strain; AR542: novel strain; E-: *Epichloë*-free control. Curves plateau for most samples, suggesting adequate sequencing depth.

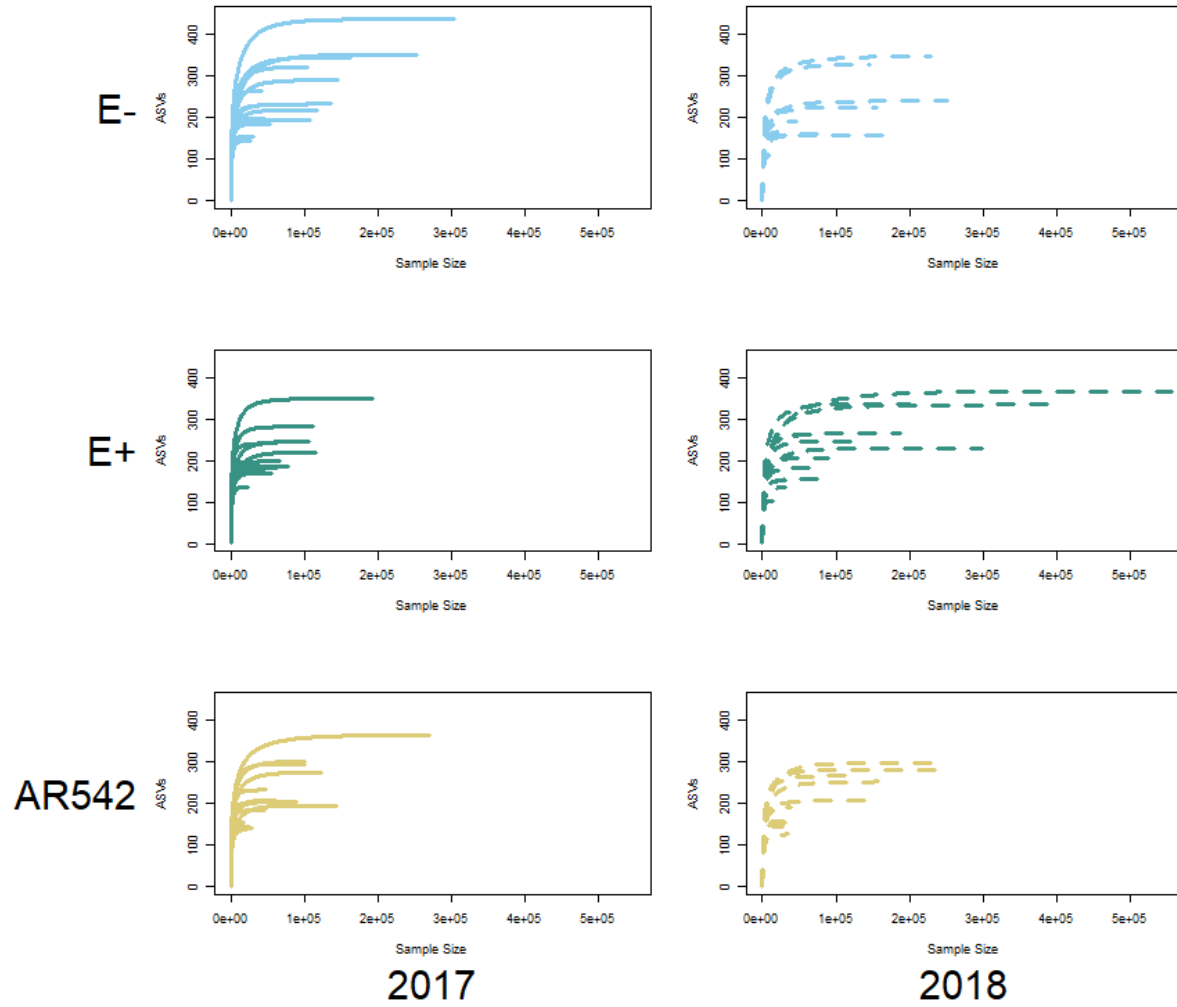

**Figure S3.** Field maps of 15 ASVs with similar abundance patterns across years. For plant ID information, see Figure 1 in the main text.

S17

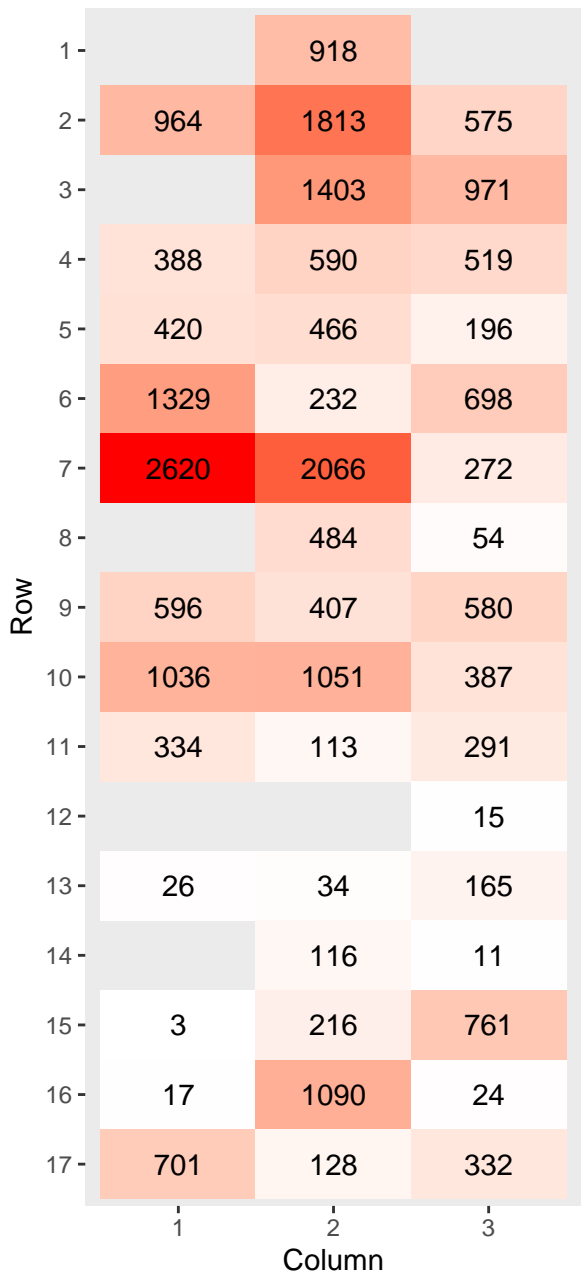

S18

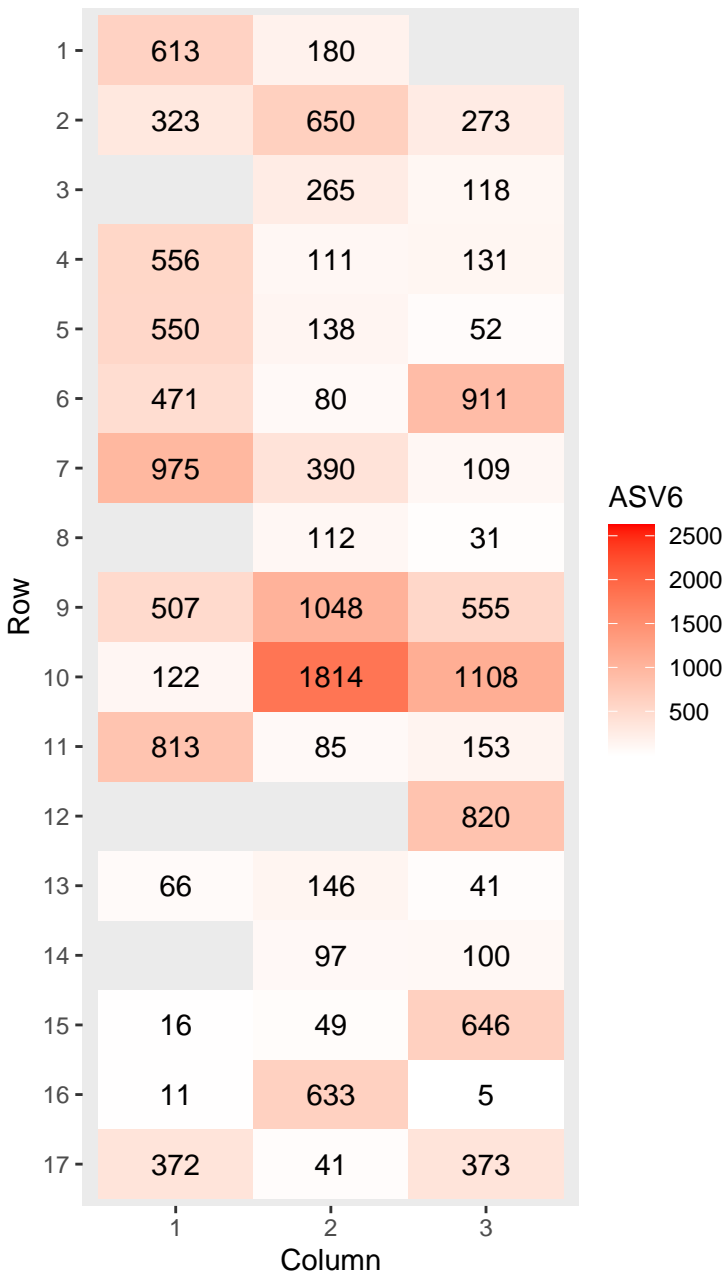

S17

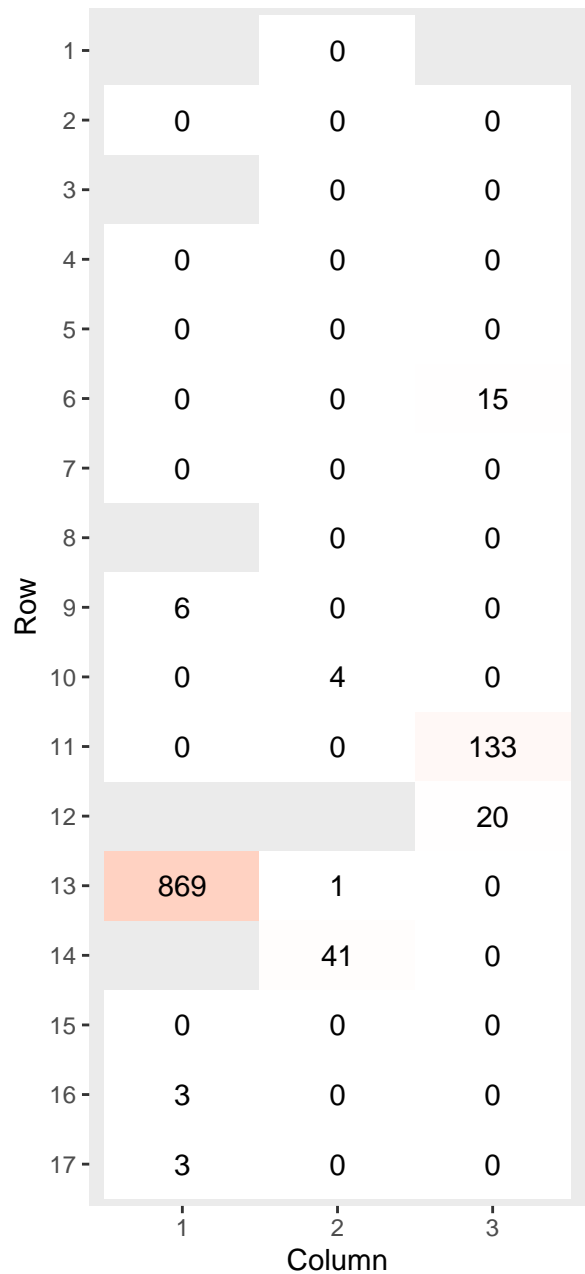

S18

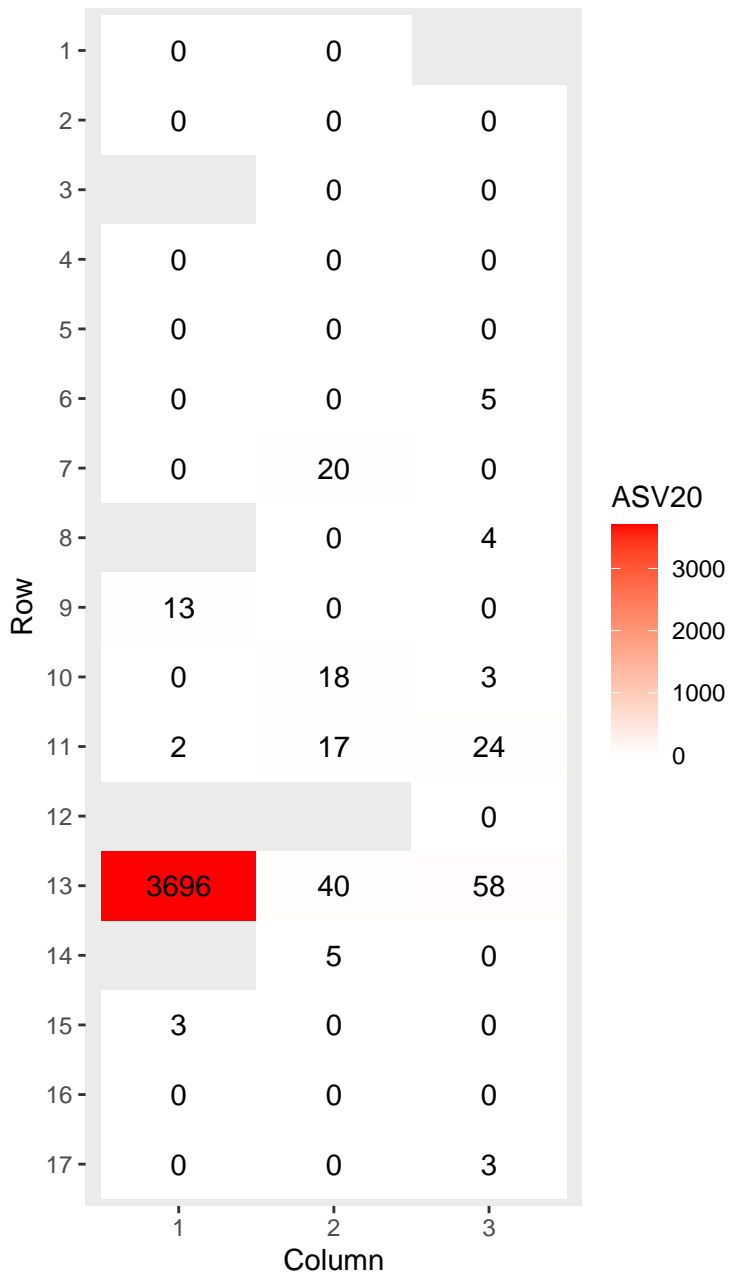

S17

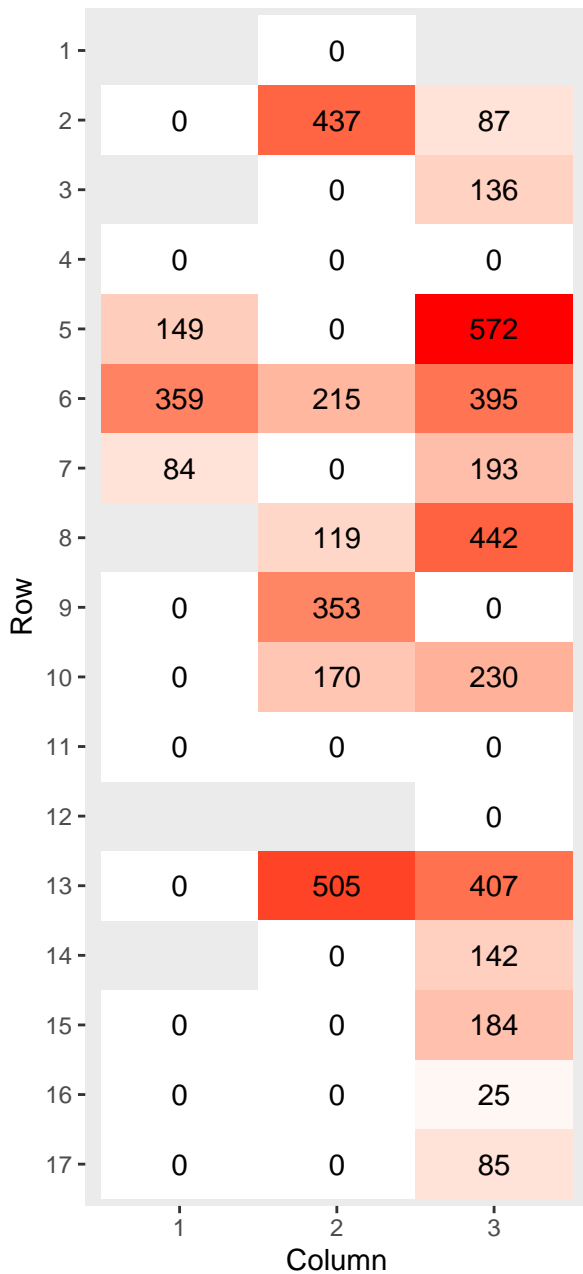

S18

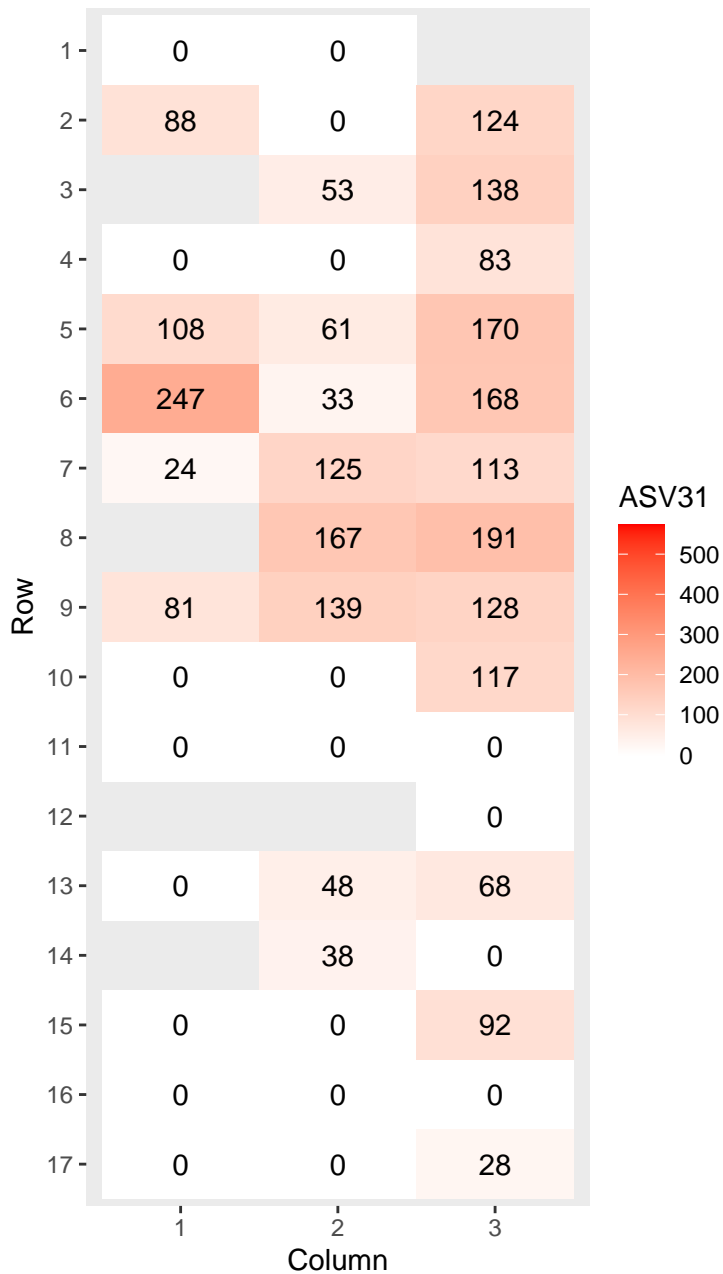

S17

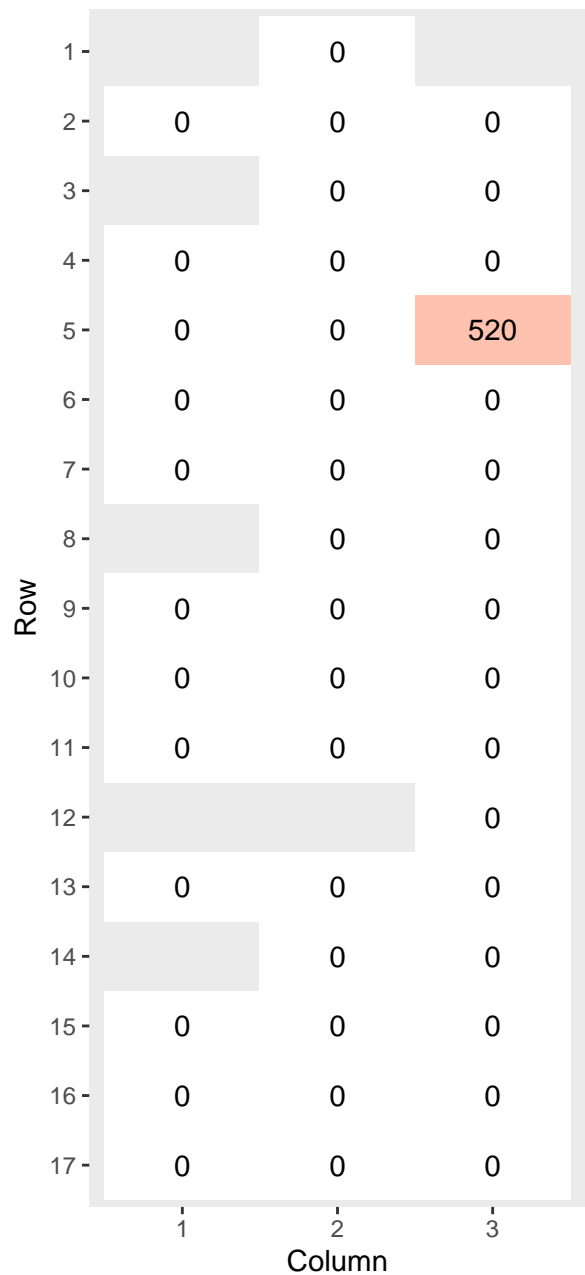

S18

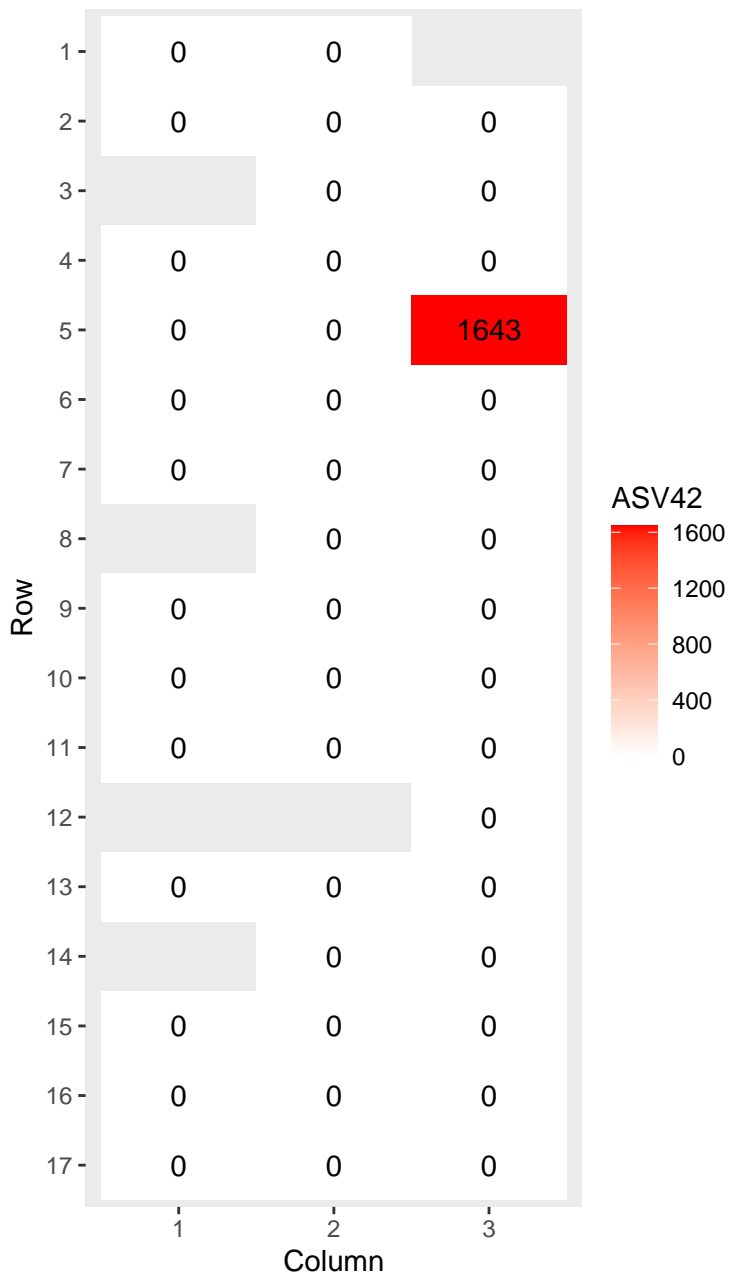

S17

S18

Row

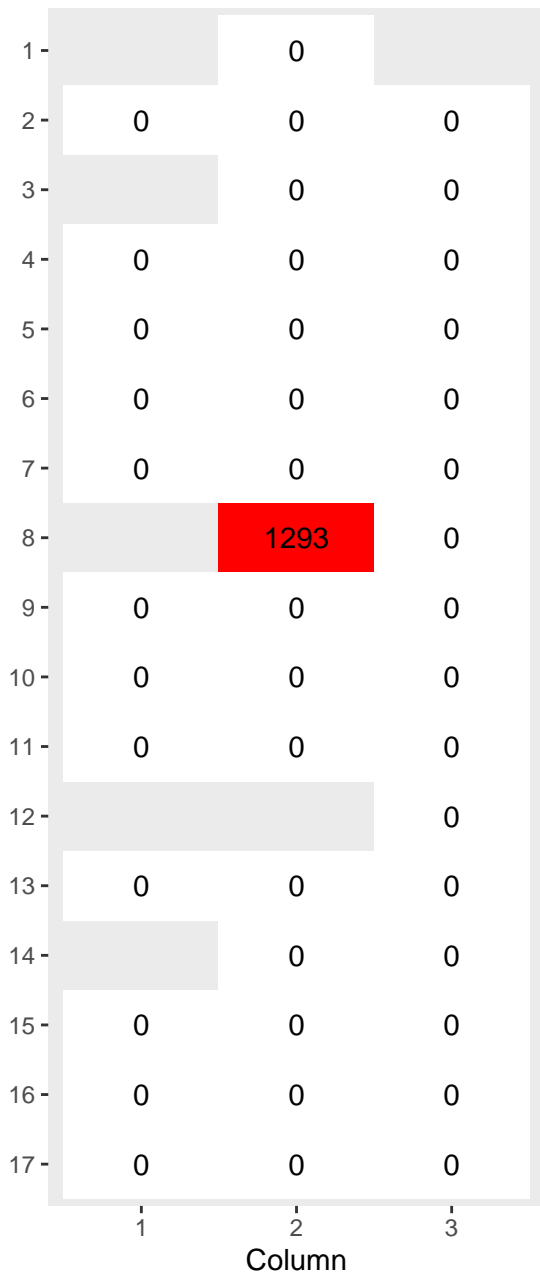

Row

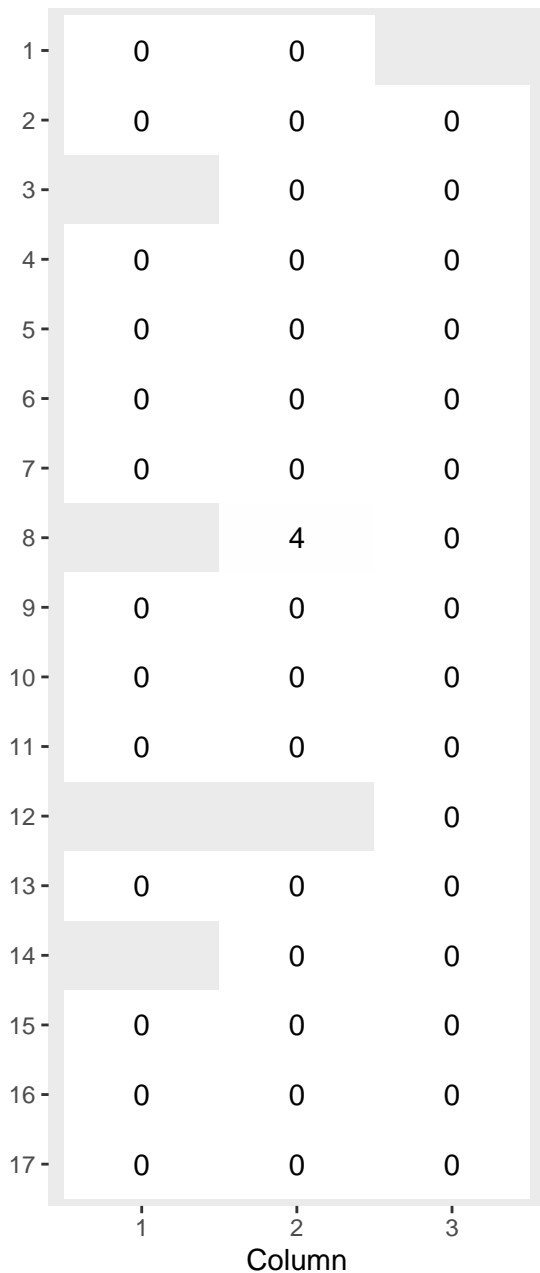

ASV45

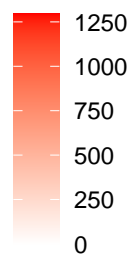

Column

Column

S17

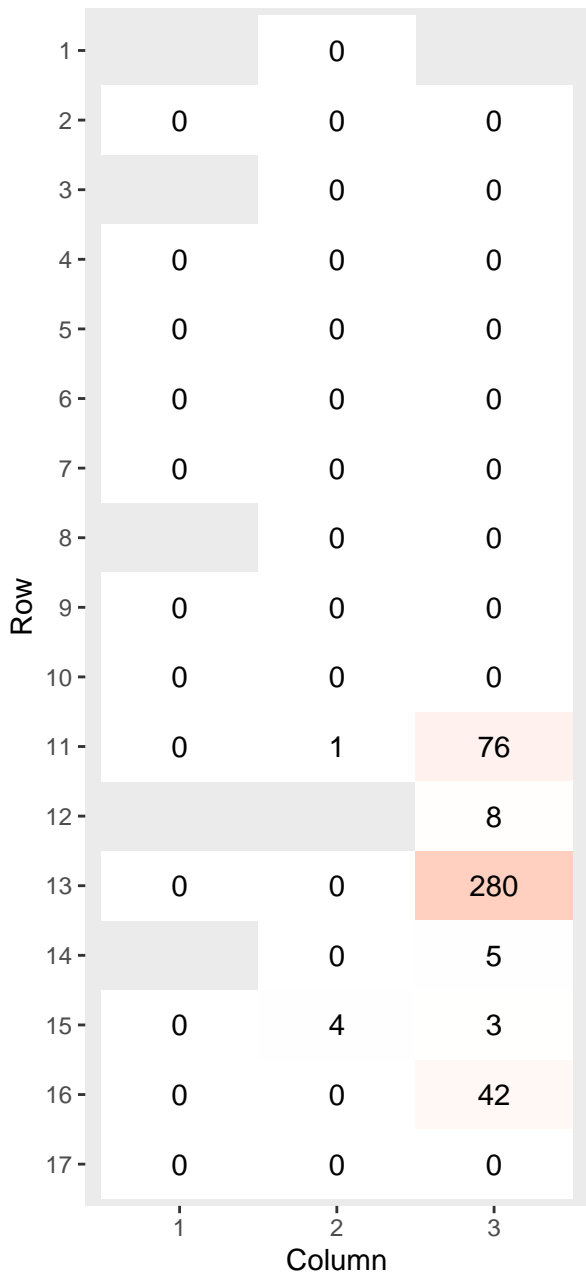

S18

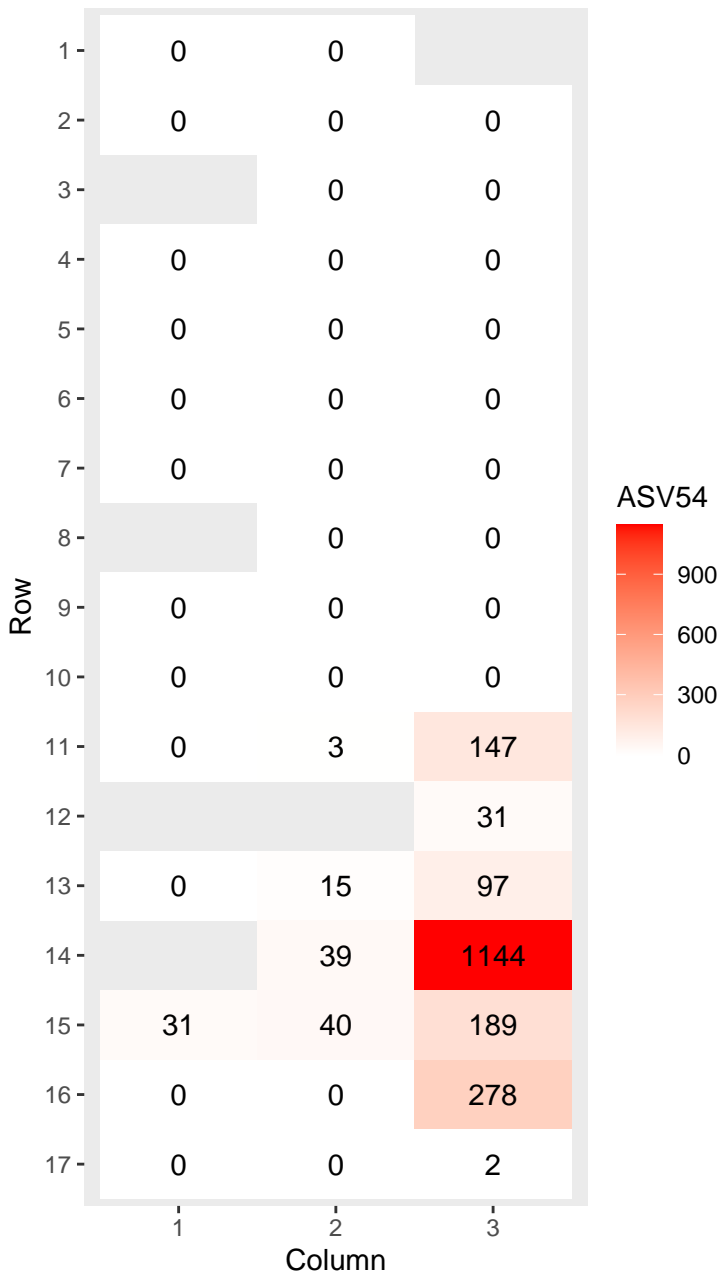



S17

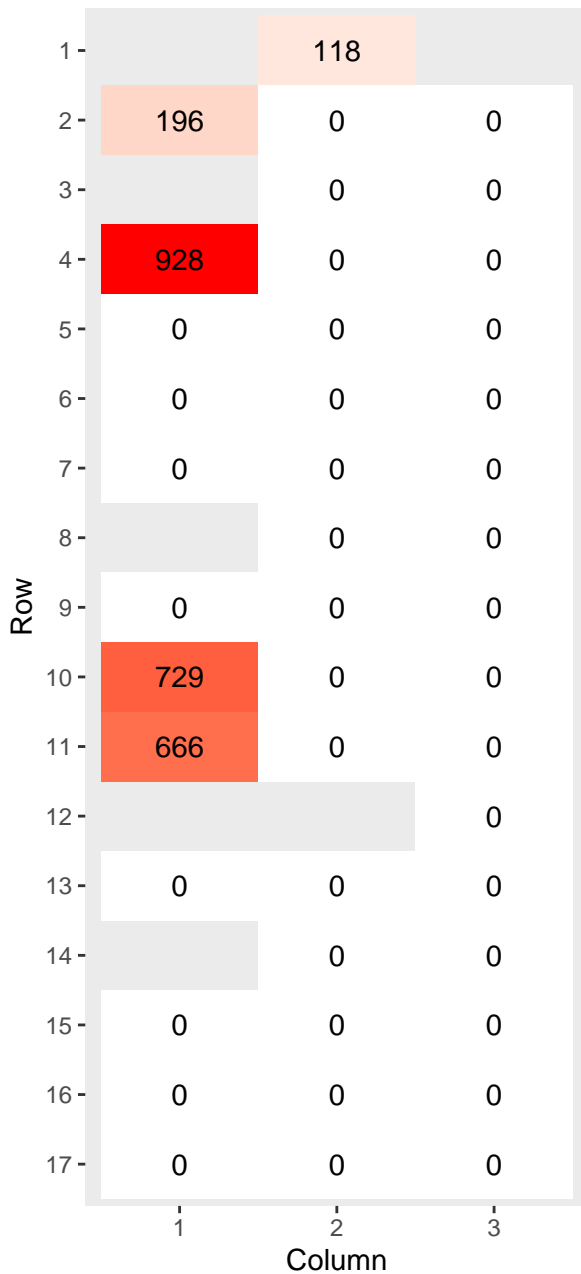

S18

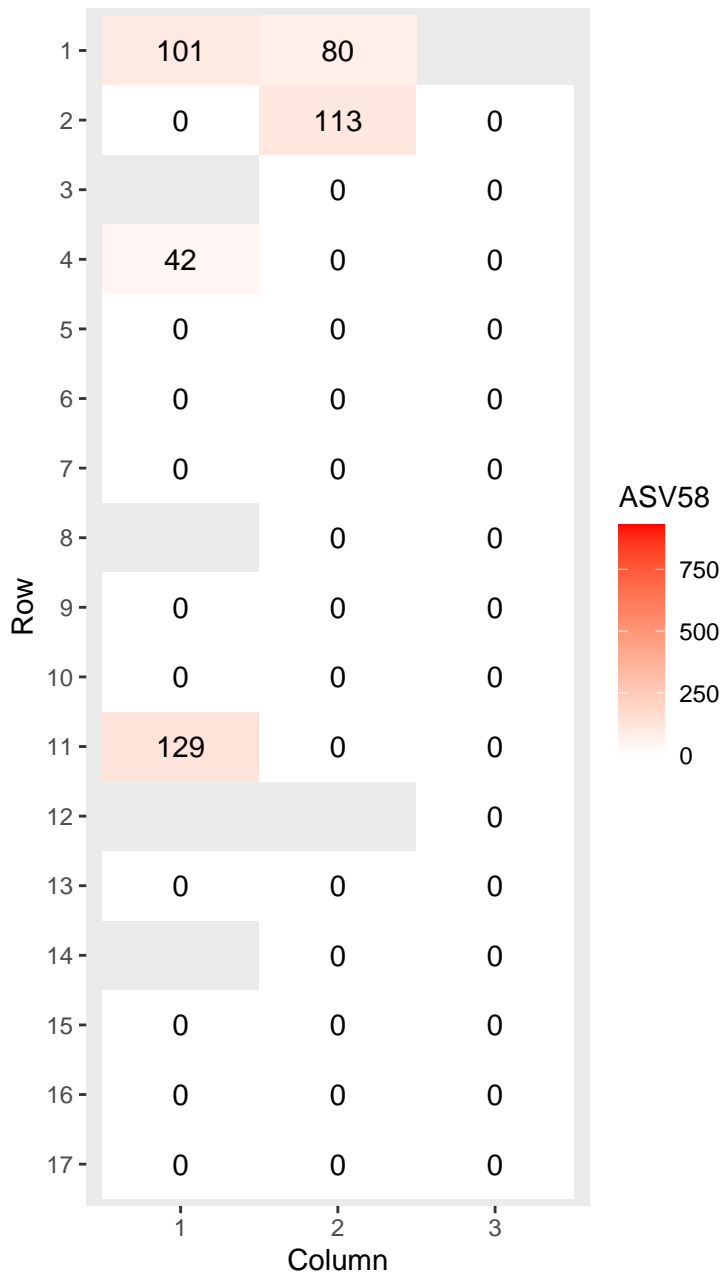

S17

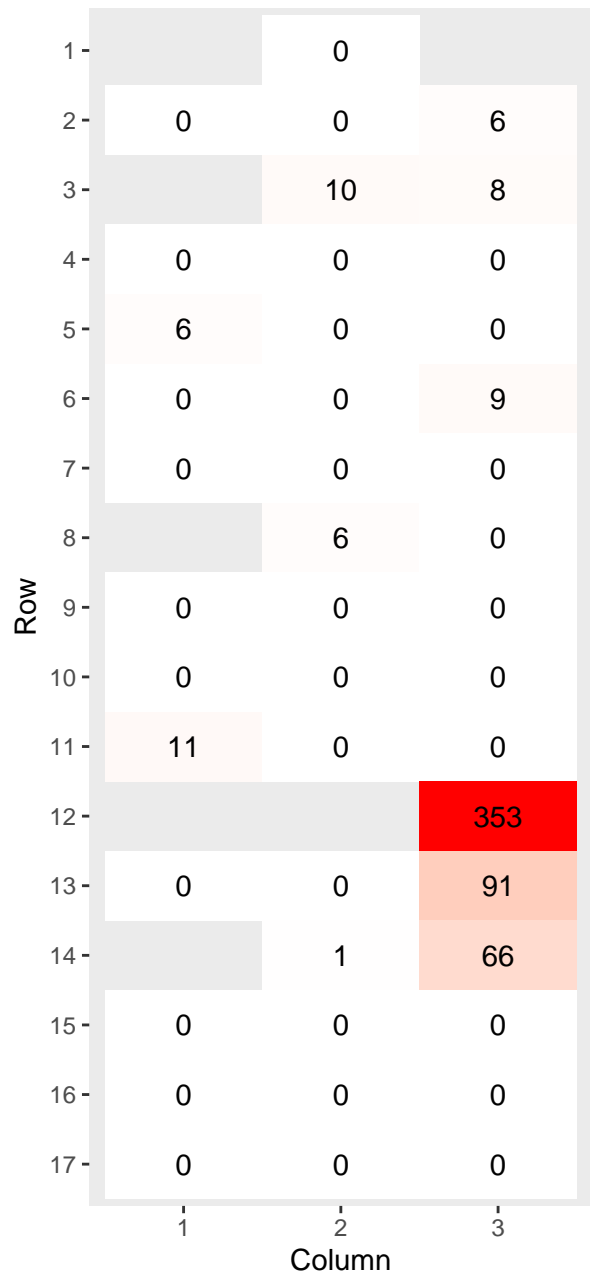

S18

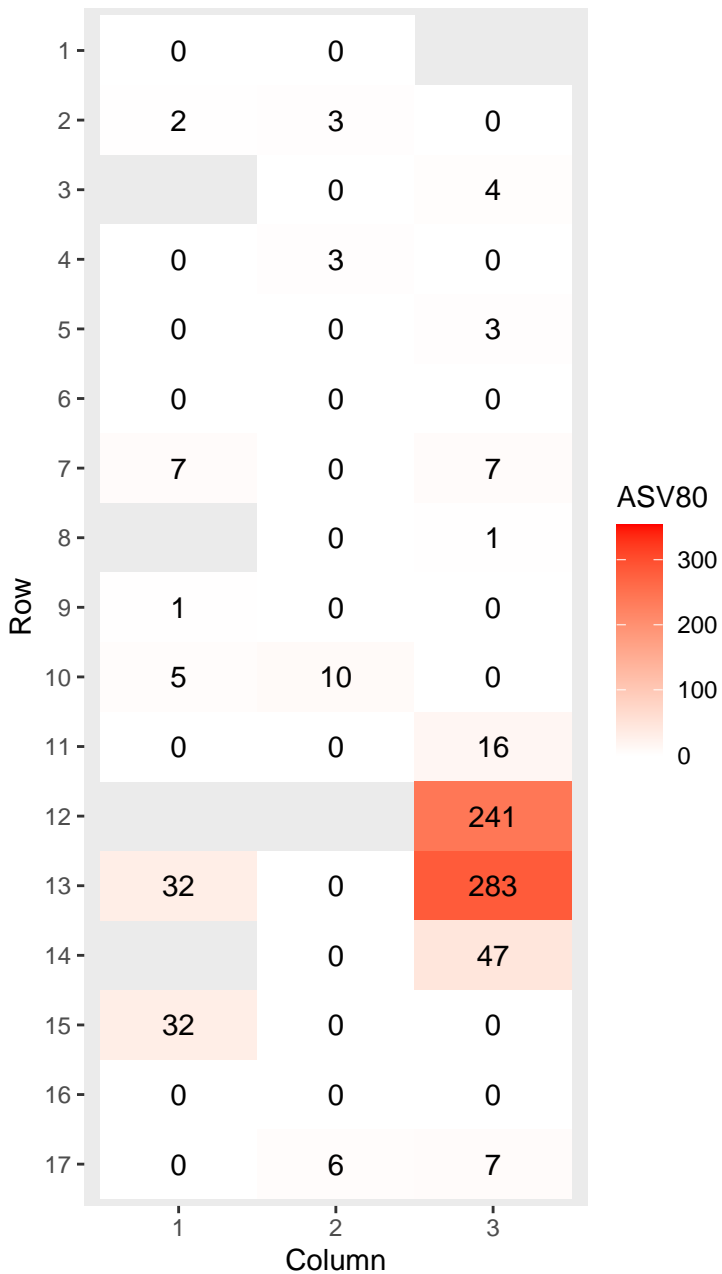

S17

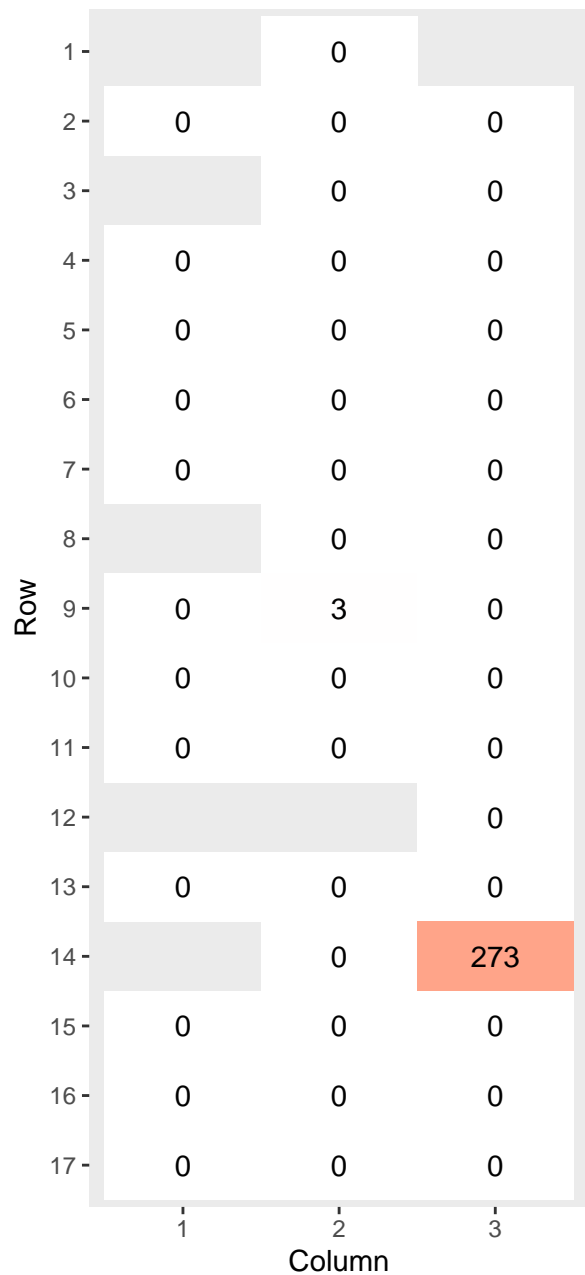

S18

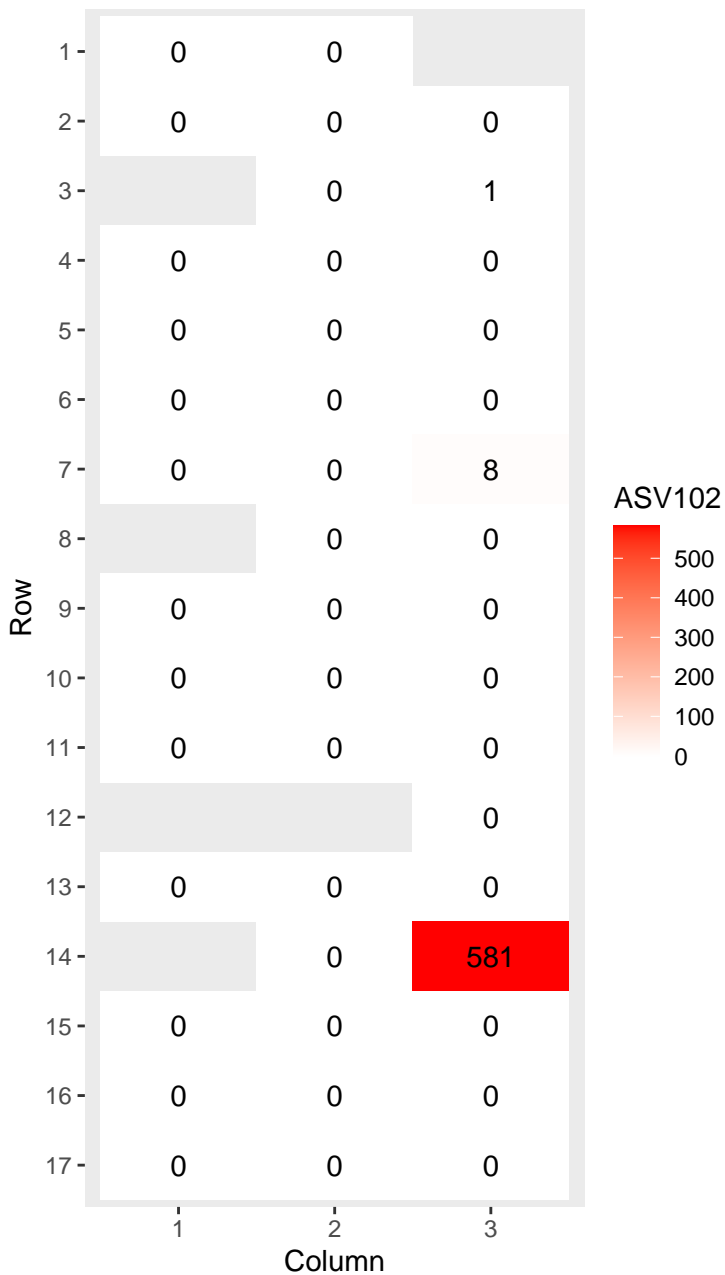

S17

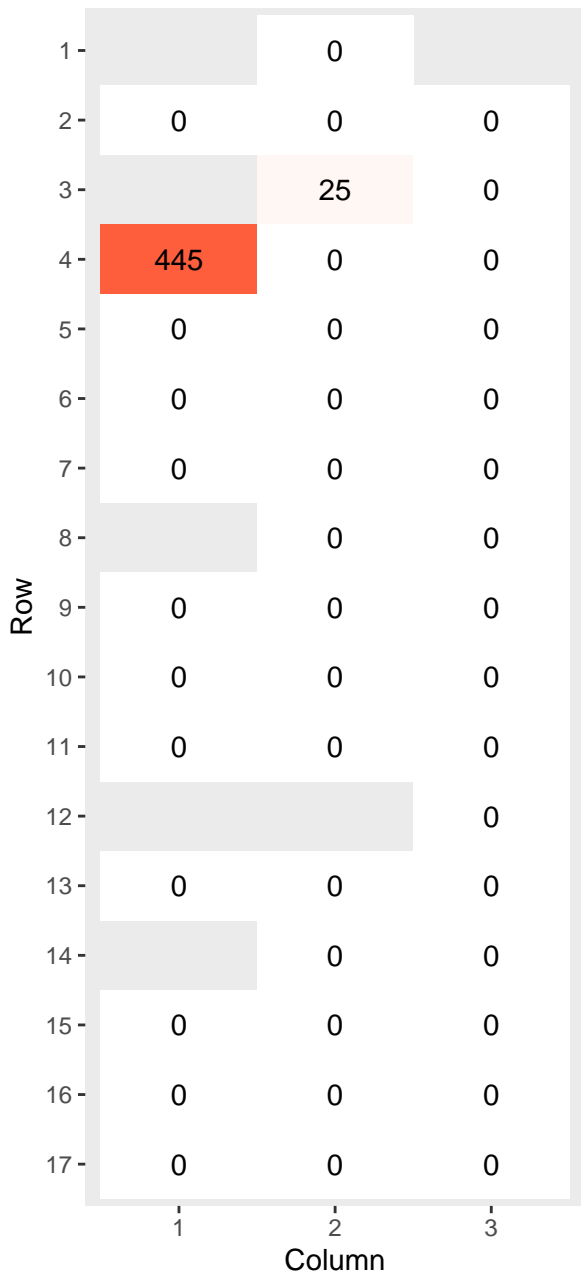

S18

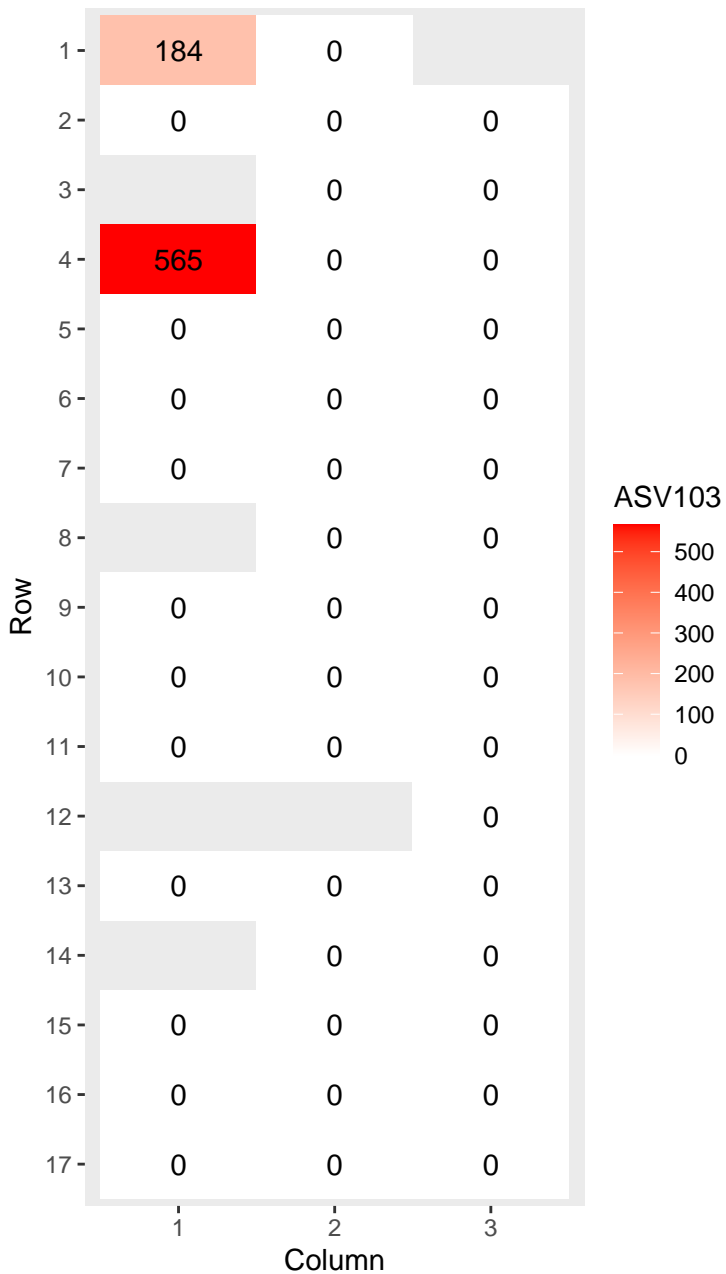

S17

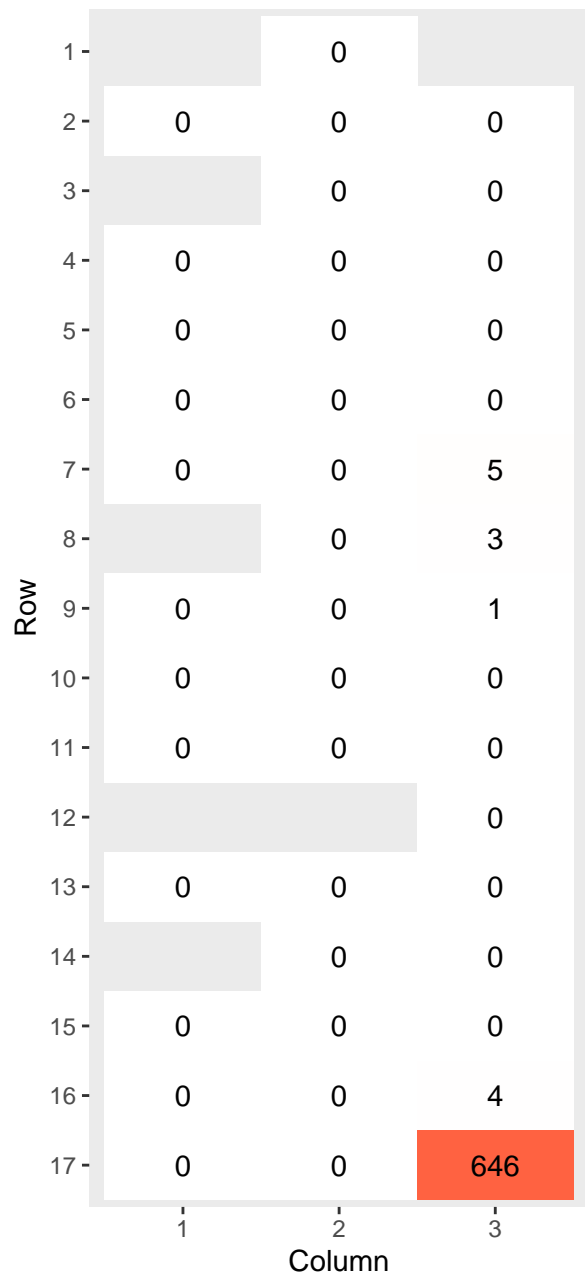

S18

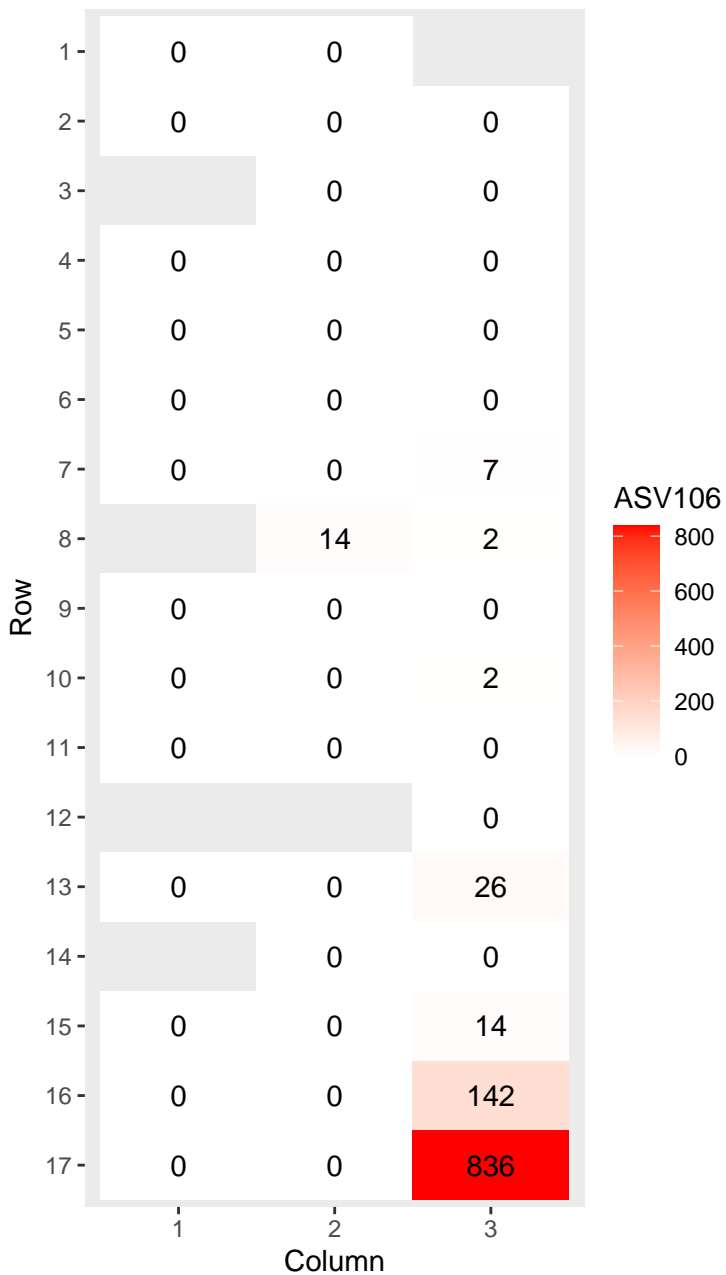

S17

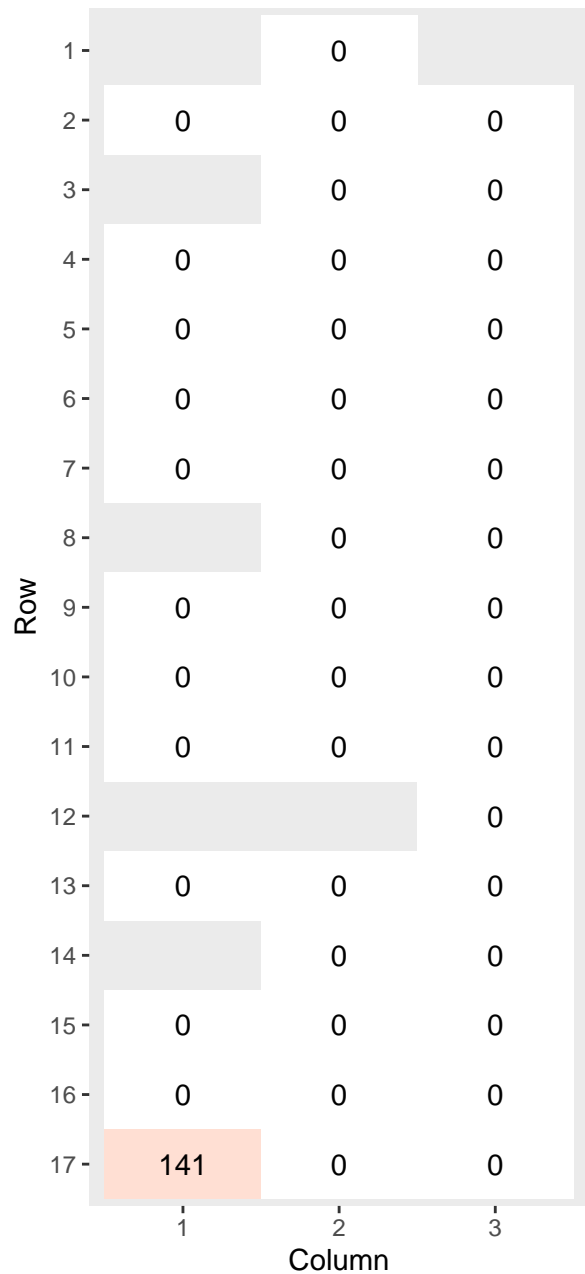

S18

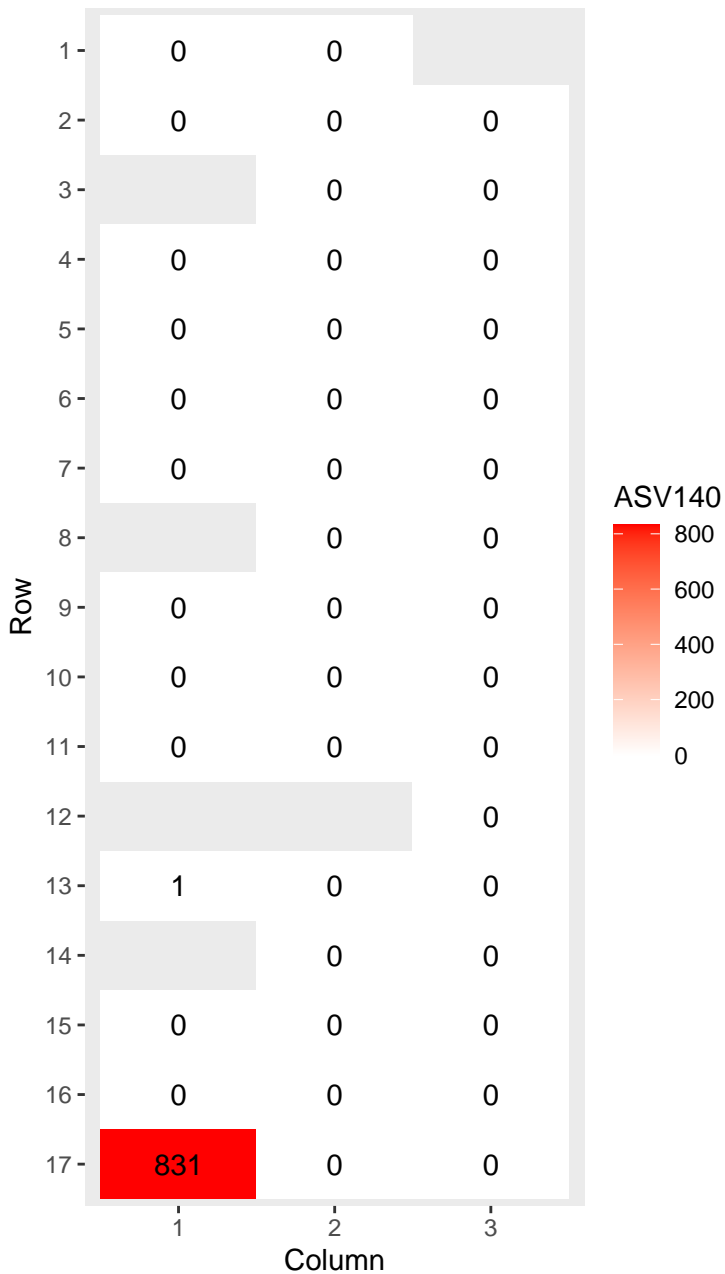

S17

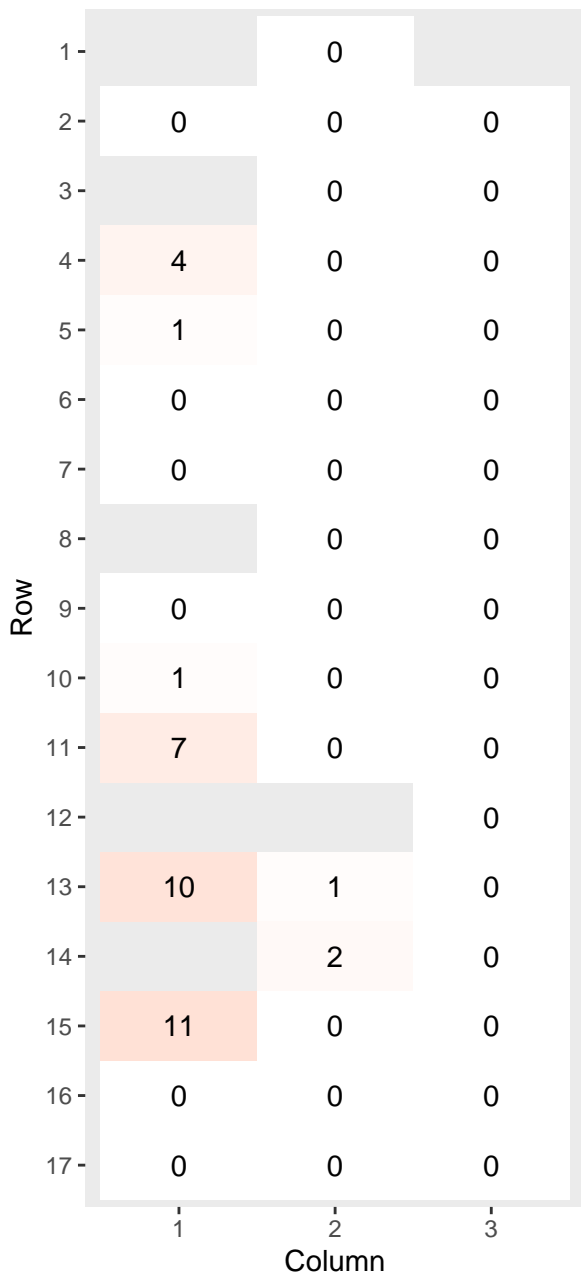

S18

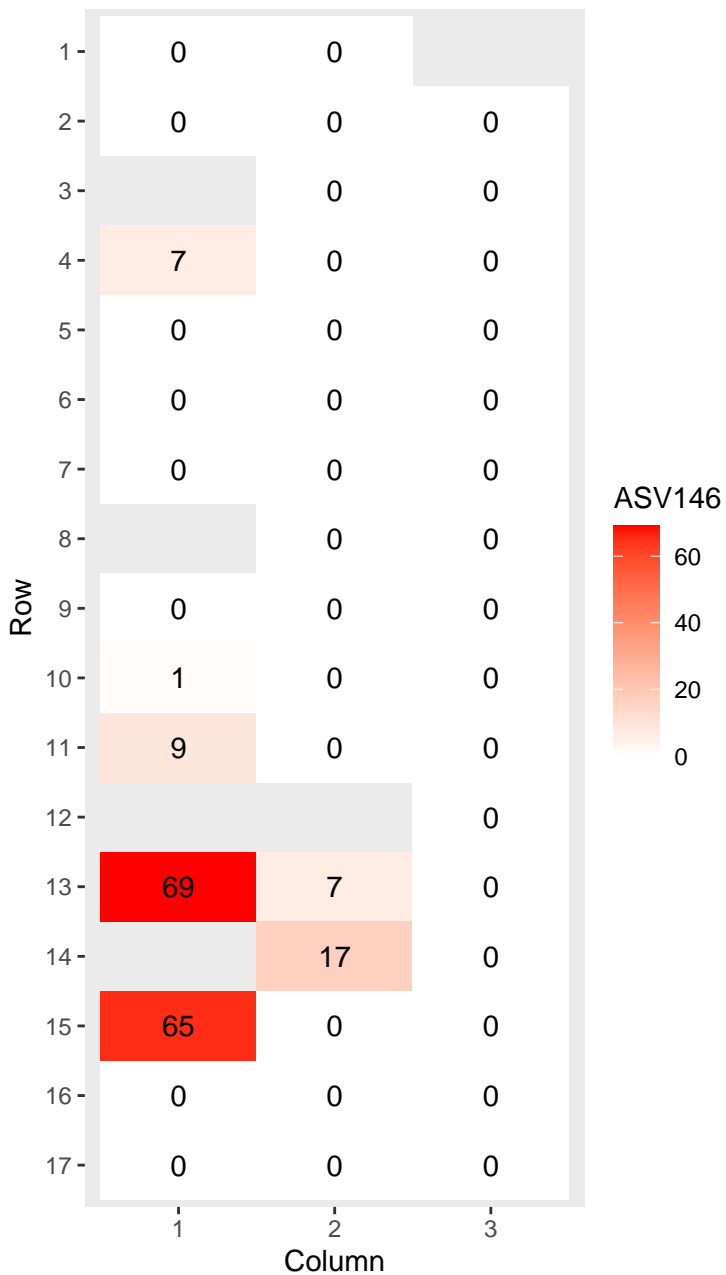

S17

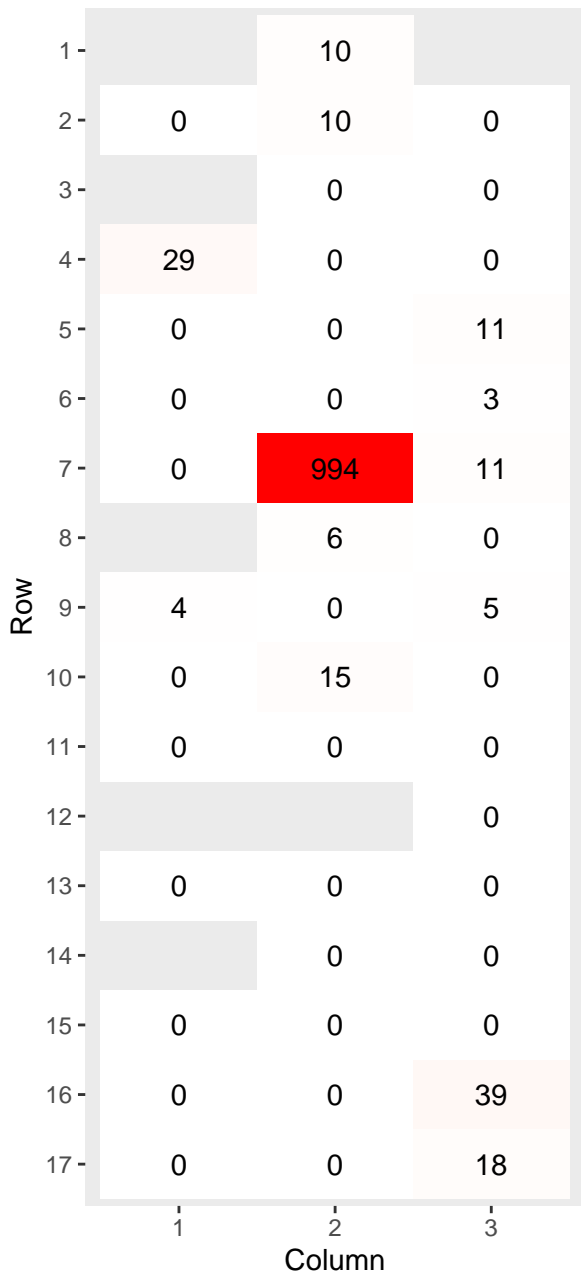

S18

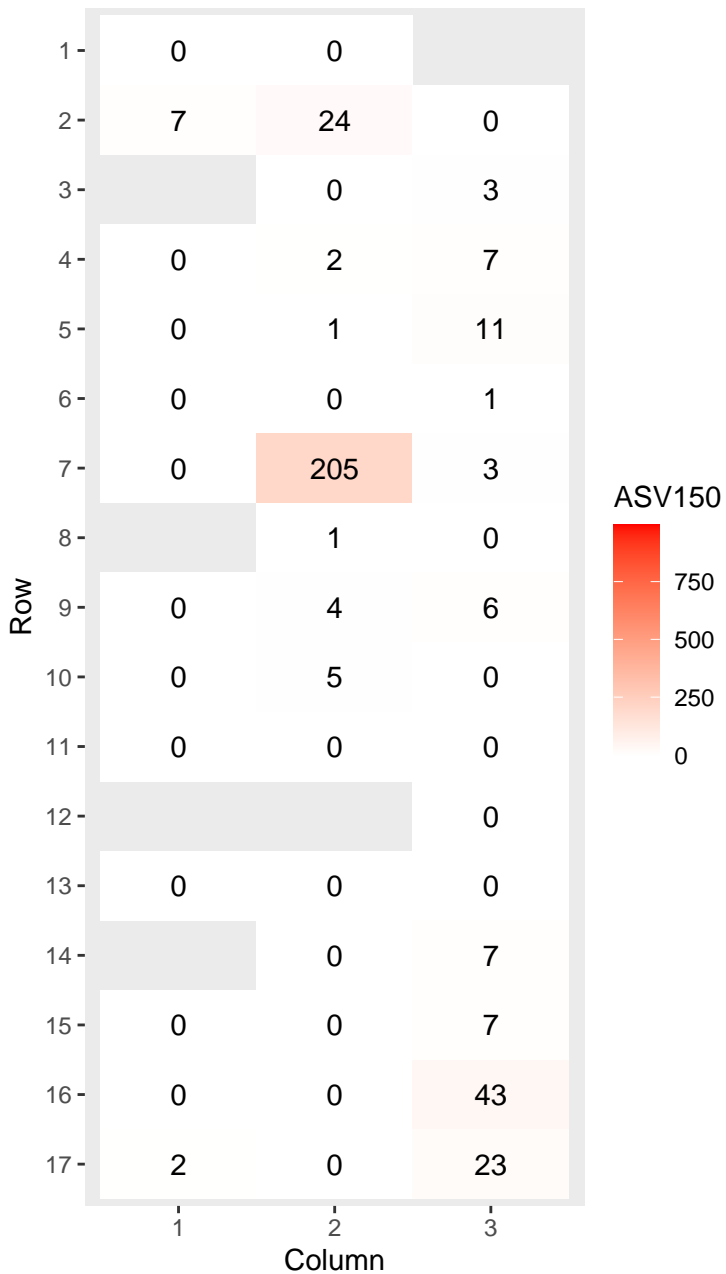



S17

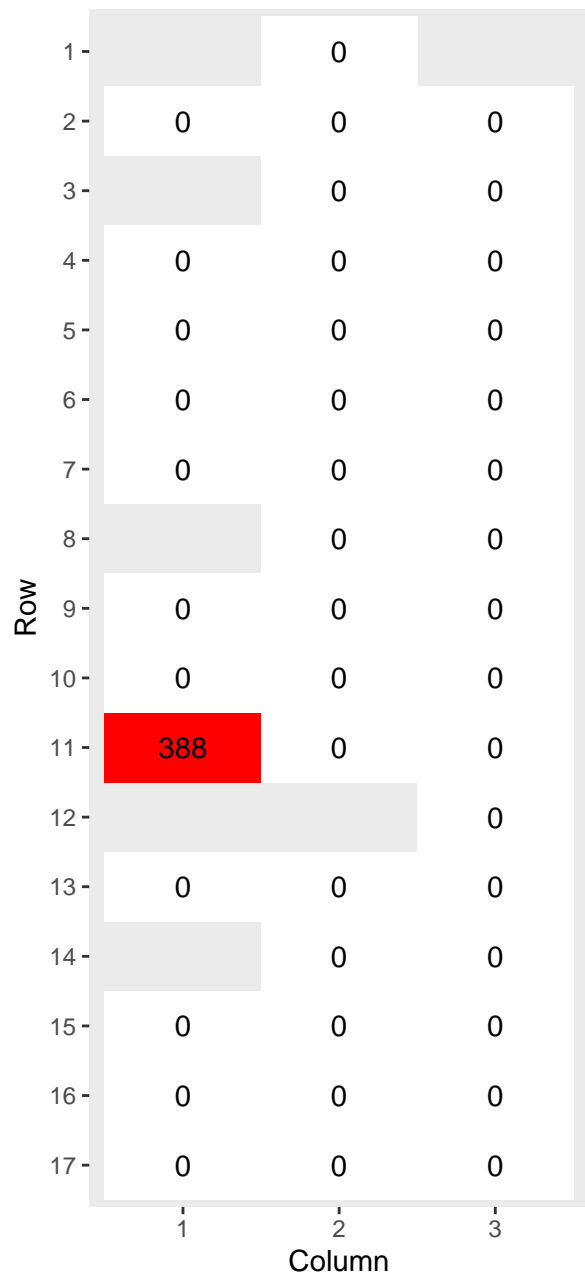

S18

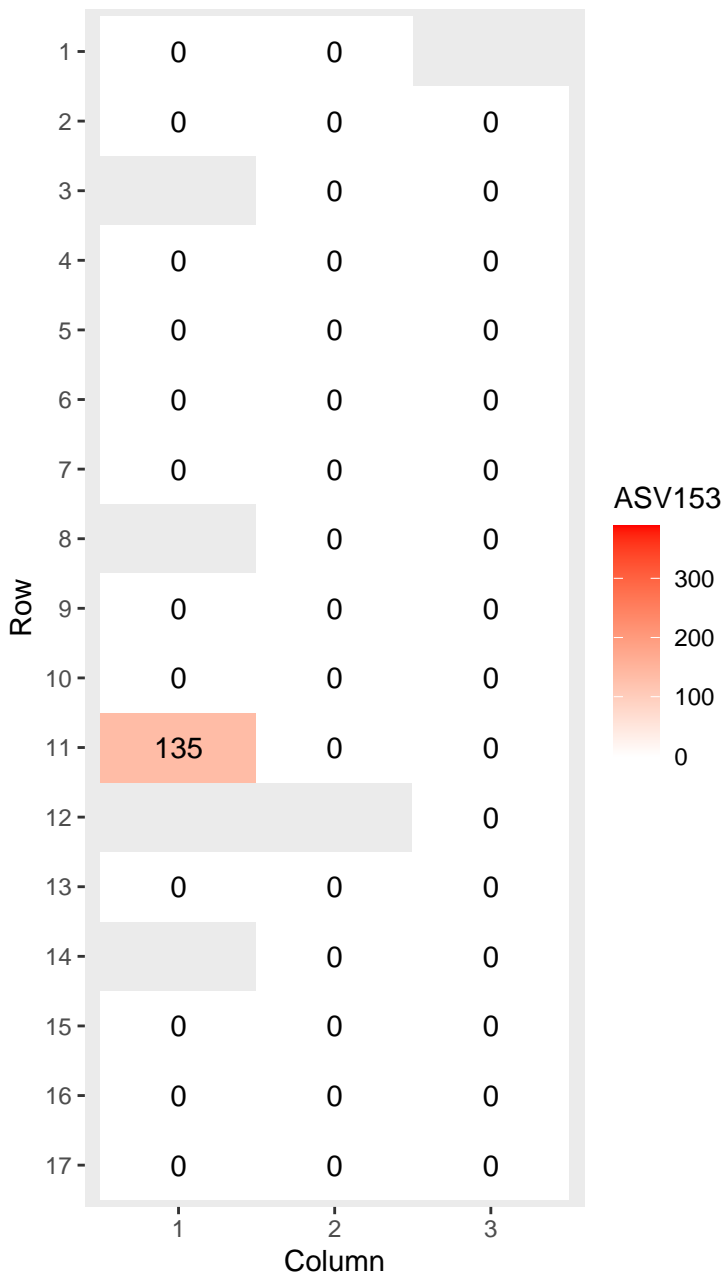

Supplement: s1 [file s1]
